# Supplementary material
Source: PubMed Central journal article supplement (PMC6527295)
Supplement: kccy-18-08-1595873-s001.pdf [file kccy-18-08-1595873-s001.pdf]

## Supplementary files

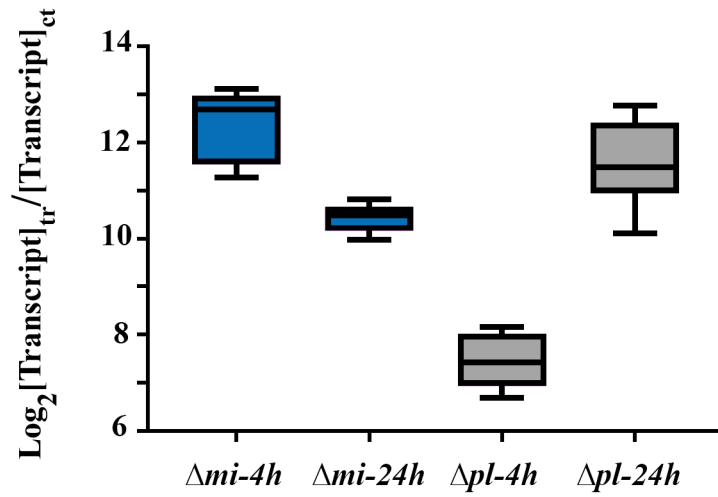

**Supplementary Fig. 1. Temporal fingerprinting of miR4673.** The expression level of miR4673 as detected by stem-loop qPCR in samples treated with naked miRNA ( $\Delta mi$ ) and the plasmid encoding miR4673 ( $\Delta pl$ ) compared to control cells (tr: transfected; ct: control; n=3 biological samples/time point).

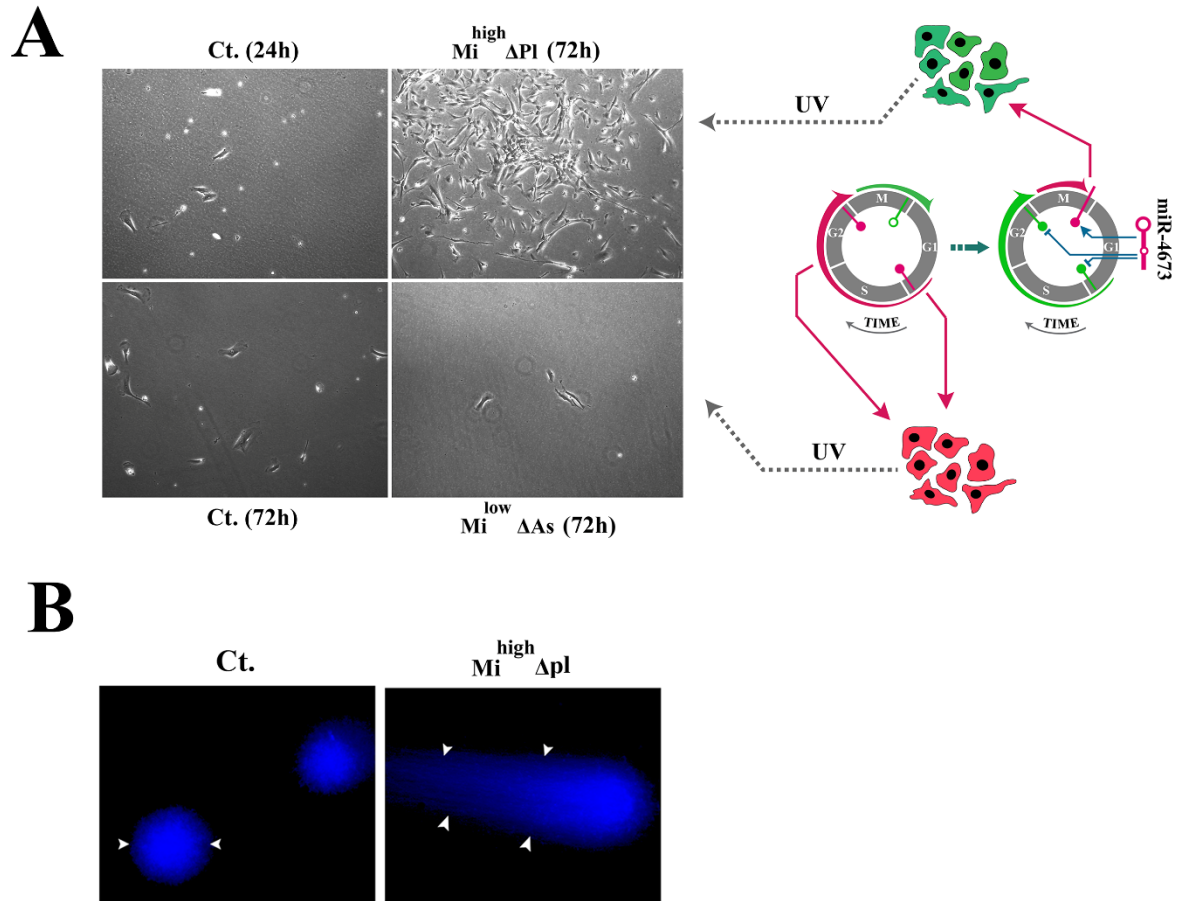

**Supplementary Fig. 2. Functional assessment of cell cycle checkpoint modulation by miR4673 signalling.** (A) After exposure to UVC (see methods)  $mi^{high} \Delta pl$  neural progenitors evaded apoptosis due to suppressed p53/p21/p27 cascades. Few surviving control cells remained quiescent post-exposure. Lowest survival rate post-exposure was observed in  $mi^{low} \Delta As$  cells due to hyperactivity of G1-S checkpoint machinery. (B) Neutral comet assay confirmed enhanced accumulation of DNA double stranded breaks in  $mi^{high} \Delta pl$  neural progenitors due to suppressed p53/p21 and silenced G1 checkpoint machinery. It is important to note that the accumulation of double-stranded breaks in  $mi^{high} \Delta pl$  neural progenitors reflects constant expression of miR4673 at a high supra-physiological level (see Supplementary Fig. 1). The endogenous expression level of miR4673 is several orders of magnitude lower than the plasmid-driven expression level.

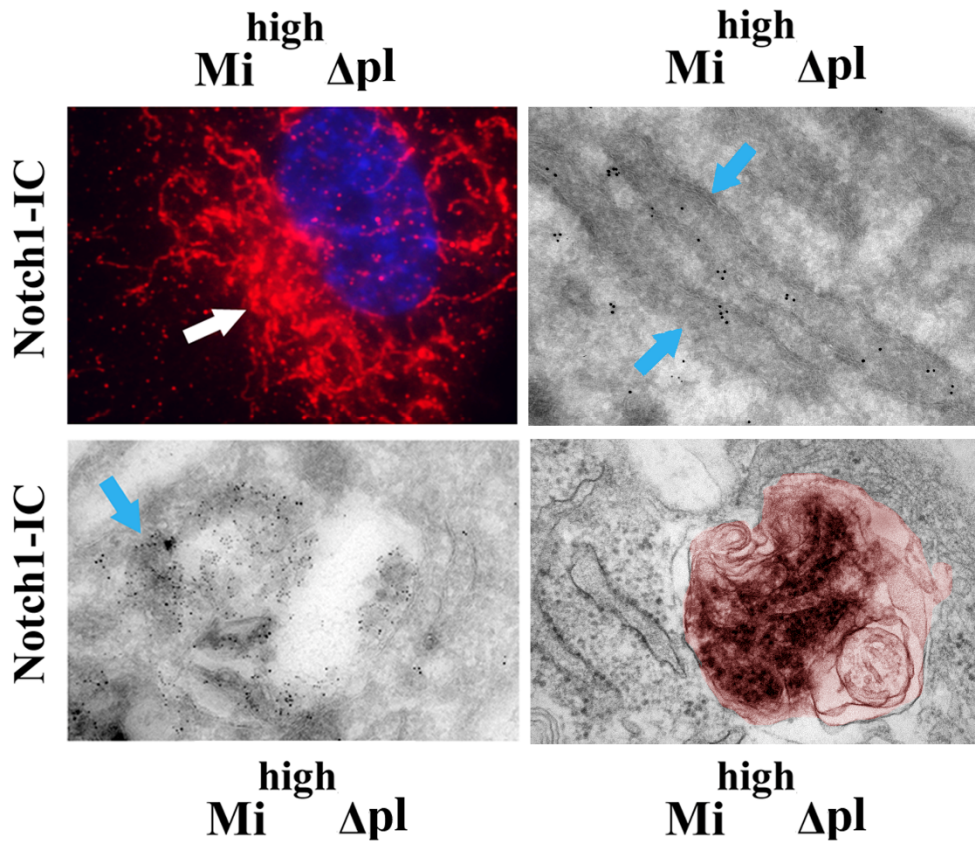

**Supplementary Fig. 3. Autophagic depletion of activated Notch-1.** Notch-1<sup>IC</sup> (cleaved intracellular Notch-1) was localized to an expanded endoplasmic reticulum in mi<sup>high</sup>Δpl cells (top left) confirmed also by immuno-gold labelling (top right, blue arrows demonstrate the endoplasmic reticulum). Immuno-gold labelling showed final degradation of activated Notch-1<sup>IC</sup> in autophagosomes of mi<sup>high</sup>Δpl cells (bottom, blue arrow shows the outer membrane of an autophagosome that has engulfed Notch-1<sup>IC</sup>)

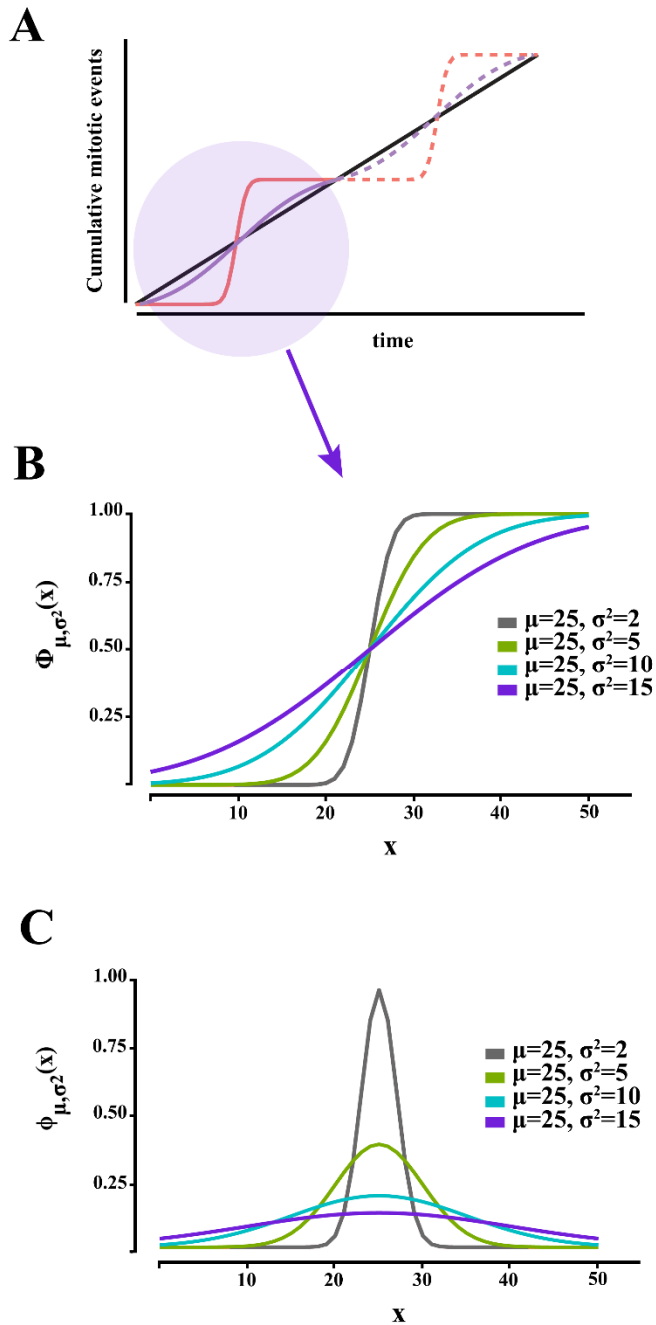

**Supplementary Fig. 4. Mathematical interpretation of the cumulative mitotic landscape.** Each mitotic wave in the graph (purple circle in A) represents the cumulative normal distribution of mitotic events (B) in a defined period of time. Deviations from linearity in B correspond to the standard deviation of the normal distribution curve (C). Synchronicity of mitotic events leads to a smaller standard deviation in the normal distribution curve and a steeper transition in the cumulative graph (compare the grey and the purple curves in B and C).

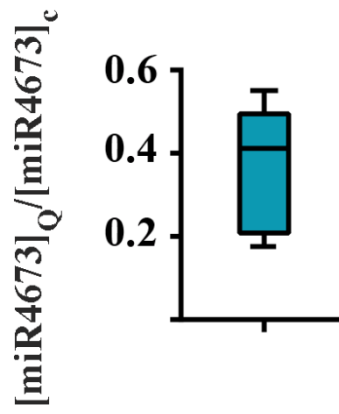

**Supplementary Fig. 5. Expression of miR4673 in quiescent (Q) cells normalized to the cycling progenitor cells (c).**

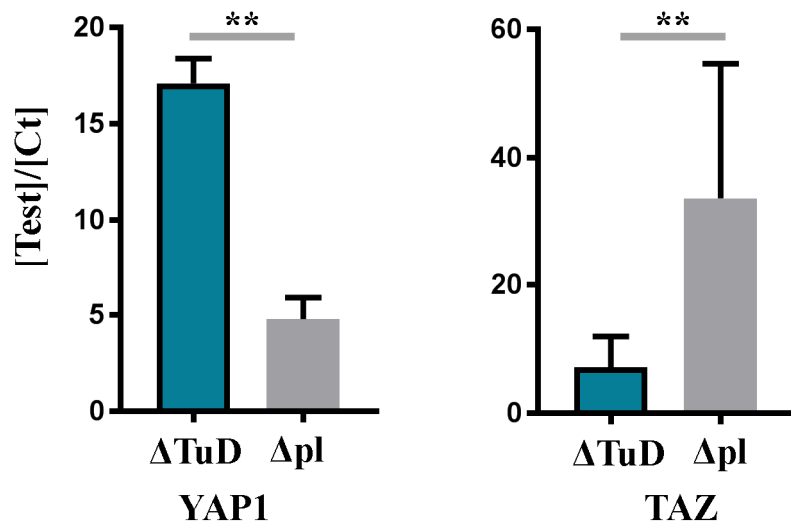

**Supplementary Fig. 6.** Transcriptional profile of Yap1 and Taz subsequent to the amplification ( $\Delta$ pl) and inhibition ( $\Delta$ TuD) of miR4673 in the growth medium. All values are normalised to  $\beta$ -actin.

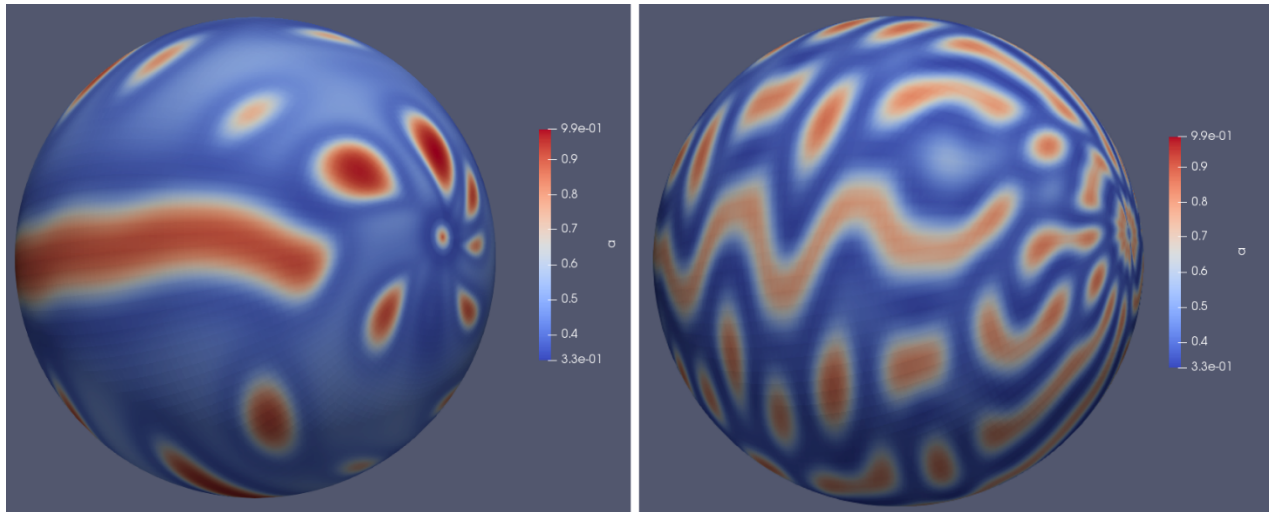

**Supplementary Fig. 7. Mathematical modelling of brain morphogenesis based on reaction-diffusion model.**

The topographical maps were generated using READY and based on the parameters that integrate findings from the bimodal regulation of cell cycle into the reaction-diffusion equations (left: macaque brain; right: human brain). Concentration of morphogens  $U$  is shown on a scale from 0 to 1 (supplementary methods).

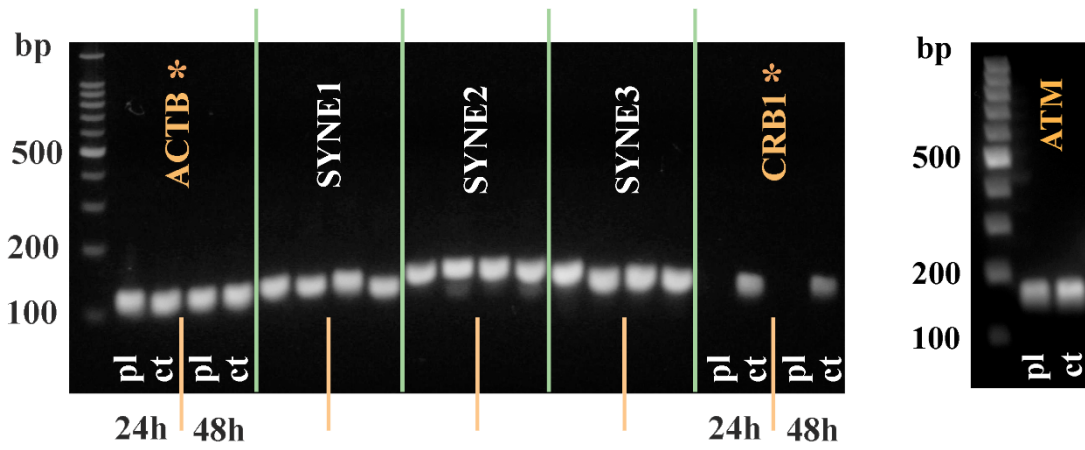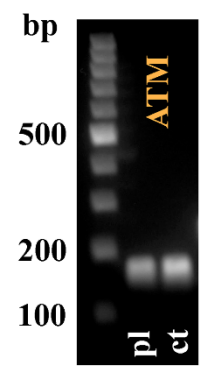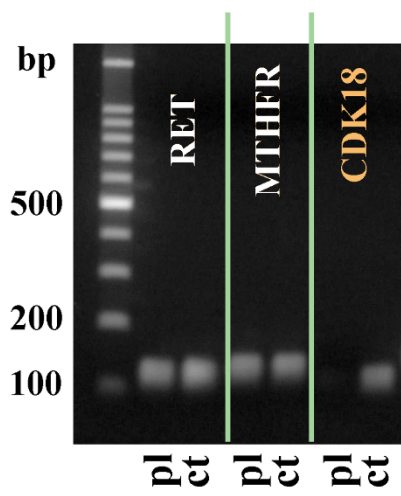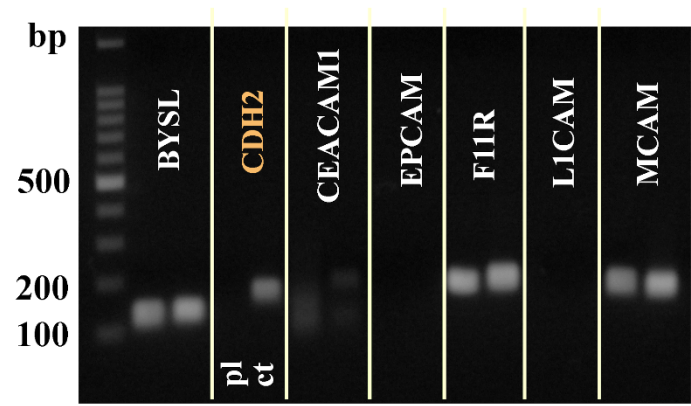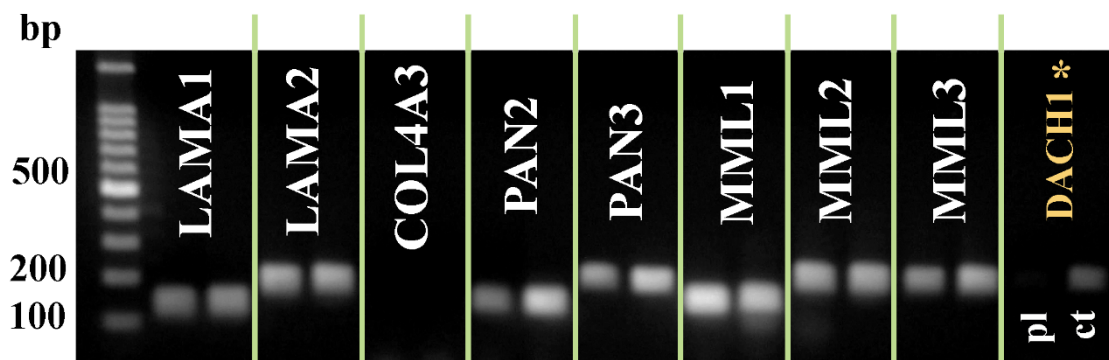



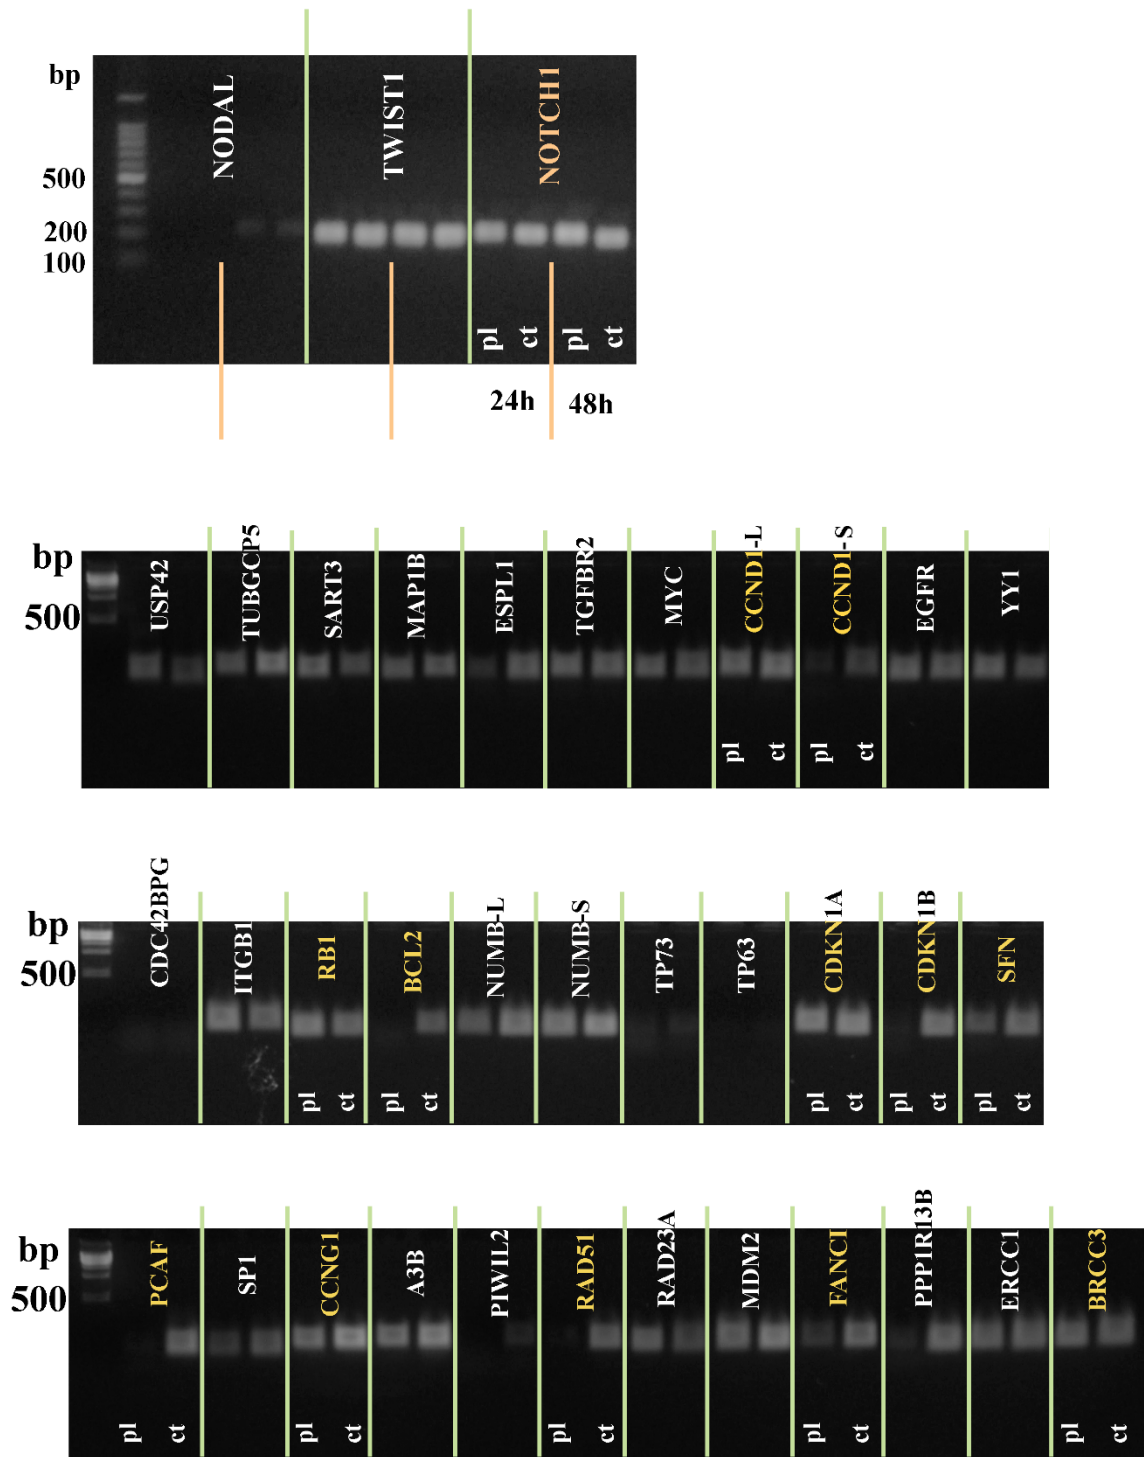

**Supplementary Fig. 8. Transcriptional fingerprinting of genes involved in control of cell cycle and intercellular communications.** Yellow indicates genes that are utilized in figures of the main manuscript.

**Supplementary Data 1.** *In-Silico* hybridization of miR4673 to G1 inhibitor gene transcripts demonstrates the lack of proper seeding regions.

### CDKN1B

mfe: -31.7 kcal/mol

```
target 5' G GG C GCCGCAACCAA U 3'
          CGG CGGCUCC GCC UGGA
          GUC GCCGAGG CGG ACCU
miRNA 3' AG AG A 5'
```

mfe: -30.4 kcal/mol

```
target 5' C A G UUGCCACCCUCUCCG U 3'
          UCGG C GGCU CUUGCCUUG
          GGUC G CCGA GGACGGACC
miRNA 3' A A G U 5'
```

### ASPP1

mfe: -35.3 kcal/mol

```
target 5' C G AAGCUU G G 3'
          CCAGU CCGG UCCUGU CUGGG
          GGUCA GGCC AGGACG GACCU
miRNA 3' A G 5'
```

### KAT2B

mfe: -30.8 kcal/mol

```
target 5' G C CU G 3'
          CUAGUCC CUCC CCUGGG
          GGUCAGG GAGG GGACCU
miRNA 3' A CC AC 5'
```

**Supplementary Data 2.** Protein homology between human cdk-18 and *Saccharomyces cerevisiae* pho85.

| Species                         | Gene Name | Gene ID         | % identity (Protein) | % coverage | Genomic location      |
|---------------------------------|-----------|-----------------|----------------------|------------|-----------------------|
| <i>Homo sapiens</i>             | CDK18     | ENSG00000117266 | 30 %                 | 57 %       | 1:205504595-205532793 |
| <i>Saccharomyces cerevisiae</i> | Pho85     | YPL031C         | 51 %                 | 94 %       | XVI:492018-493037     |

```

ENSP00000423665/1-504 MIMNKMFKRRFSLVPRTEIEESLAEFTEQFNQLHNRNENLQLGLGRDPPQECSTFSPTDSGEEPGQLSPGVQFQRRQNRFRSMEVRAAGALPRQVAGCTHKGVHRAAALQPD
YPL031C/1-305 -----
-----

ENSP00000423665/1-504 FDVSKRLSLPMDIRLQPEFLQKLQMESPDLPKPLSRMSRRASLSDIGFGKLETYYVLDLLEGTIATVFKRSLLLENLVALKEIRLSEHDEGACFAIREVRLNIMPHANVTIHLH
YPL031C/1-305 -----MSSSQFKQLKLNGLIYATVYKLNITLGVYALKKVKLDSDEGTSFAIREIRLSEHDEGACFAIREVRLNIMPHANVTIHLH
          :.:***:*****:* * * *****:.; **:*.*.*****:*.*** ** *.:**

ENSP00000423665/1-504 DRSLTLVPEYLLSGLKQLLHC----GNLMSMHNKLIIMFQLLRSLAYCHHKILHRDLKPNLLINERGEIKLADPGLARAKSVITKTYNEVVTLWYRFPDVLLSSTEYSPIMM
YPL031C/1-305 -----ENKLTLVPEFEMNDLAKIMSRVTGNTPRGLEINLKYIQWQLLQGLAFCHENKILHRDLKPNLLINKRQQLKIDPGLARAFGIIVNIFSEVVTLWYRFPDVLIMGSRITYSTIILH
*.:*****:*.***:*.*          .:.: ** * :***:***:*.*****:***:*****. :*.:*.*.*****.***:** ** *.:**

ENSP00000423665/1-504 GVGCTHYENATGRPLFPGSTVKEEELIIFRLLOTTEETWQVAFSEFRTYSF---CYLQ-----PLINHAERLDTDGIHLLSSLLVYESKSRMSAEALSSVRSLSGERVHQ
YPL031C/1-305 -----SCGCLAEMLIKKPLFESTNDEIQKLIIDIMTINSLNWSVTKLPKY--N--NIQQRPFERDLRQVLQP--HTKE--LGNLMDFEGHLLQLNFDMLSAKQLHEHPFA-----
. *** ** *.:*****:*.***:*.*          .:.: ** * :***:***:*.*****:***:*****. :*.:*.*.*****.***:** ** *.:**

ENSP00000423665/1-504 LEDTASIFSLKEIQLKDPGYRGLAFQQP-GRGKNRRQSIIF
YPL031C/1-305 -----EYHHAS
          :.:
  
```

## Supplementary tables

**Supplementary Table 1. Transcript-specific primers used in the current study.**

| Gene            | Accession No.  | Oligos               | Primer sequence                                     | Amplicon size (bps) |
|-----------------|----------------|----------------------|-----------------------------------------------------|---------------------|
| <b>RAD51</b>    | NM_002875.4    | F-primer<br>R-primer | TGCCAGCTTCCCATTGACCG<br>CCAGGACATCACTGCCAGAGAG      | 130                 |
| <b>PPP1R13B</b> | NM_015316.2    | F-primer<br>R-primer | CCTGCTGGGGCTGTATCCAC<br>AAGTGGCTCCTGGTAGCTGG        | 101                 |
| <b>FANCI</b>    | NM_001113378.1 | F-primer<br>R-primer | CCCTCCTCTCCTCAGTTTGTGC<br>CGAAACATGCAGGCTGAAGAGCA   | 123                 |
| <b>GADD45A</b>  | NM_001924.3    | F-primer<br>R-primer | CGTGCTGGTGACGAATCCACA<br>GCCATCACCGTTCAGGGAGAT      | 148                 |
| <b>TP53</b>     | NM_000546.5    | F-primer<br>R-primer | GCTCAGATAGCGATGGTCTGGC<br>CTCATAGGGCACCACCACACT     | 131                 |
| <b>SFN</b>      | NM_006142.3    | F-primer<br>R-primer | AGGGTGACTACTACCGCTACCTG<br>GGCATCTCCTTCTTGCTGATGTCC | 118                 |
| <b>BCL2</b>     | NM_000633.2    | F-primer<br>R-primer | CTGGTGGACAACATCGCCCTG<br>CAGTTCCACAAAGGCATCCCAGC    | 99                  |
| <b>KAT2B</b>    | NM_003884.4    | F-primer<br>R-primer | CCTGGAATTAGAGAGACAGGCTGGA<br>GATGGCTCTTCACCTGCTGGA  | 118                 |
| <b>CCNG1</b>    | NM_004060.3    | F-primer<br>R-primer | GCCTCAGAATGACTGCAAGACTAAGG<br>GGTGCTTGGGCTGTACCTTCA | 150                 |
| <b>XRCC3</b>    | NM_001100119.1 | F-primer<br>R-primer | GCATCAACCAGGTGACAGAGGC<br>GGTCAGCCAGCAGTCTCACC      | 120                 |
| <b>BRCA1</b>    | NM_007294.3    | F-primer<br>R-primer | CAGCTTGACACAGGTTTGGAGTATGC<br>GGCACGGTTTCTGTAGCCCAT | 123                 |
| <b>BRCA2</b>    | NM_000059.3    | F-primer<br>R-primer | TTGTGAAGGGTCGTCAGACACC<br>GCACAGTAGAACTAAGGGTGGGTG  | 117                 |

|                            |                                    |                      |                                                         |     |
|----------------------------|------------------------------------|----------------------|---------------------------------------------------------|-----|
| <b>CUL1</b>                | NM_003592.2                        | F-primer<br>R-primer | TGACAAACTCAGAACCCCTAGACTTGG<br>CGTTCCAACCTCTGACGGCAAGG  | 109 |
| <b>CCND1-short isoform</b> | NM_053056.2<br>(ENST00000227507.2) | F-primer<br>R-primer | CACCTGGATGCTGGAGATGTGAAG<br>AGGCGGTAGTAGGACAGGAAGTTG    | 128 |
| <b>CCND1-long isoform</b>  | ENST00000536559.1                  | F-primer<br>R-primer | CTGCTGCAAATGGAGCTGCTC<br>CTGTTTGTCTCCTCCGCCTCTG         | 120 |
| <b>CDK18</b>               | NM_002596.3                        | F-primer<br>R-primer | CCGAGAGGTGTCTCTGCTGAAG<br>CAGGTAACAAACACCAGGGTGAG       | 103 |
| <b>NOTCH1</b>              | NM_017617.4                        | F-primer<br>R-primer | GCATCTGTGCCAGTACGATGTGG<br>CCGTGTACCCTTCCGTGCA          | 113 |
| <b>CRB1</b>                | NM_201253.2                        | F-primer<br>R-primer | CGAGGTGGACTTGGCAGATGAC<br>GGAGGTGACAACAGAAGCAACAATGG    | 115 |
| <b>CDH2</b>                | NM_001792.4                        | F-primer<br>R-primer | GAGCTGACCAGCCTCCAACCT<br>TGCATGTGCCCTCAAATGAAACCG       | 116 |
| <b>CDKN1A</b>              | NM_001291549.1                     | F-primer<br>R-primer | CCTGTCACTGTCTTGTACCCTTGTG<br>GGAGTGGTAGAAATCTGTCATGCTGG | 124 |
| <b>CDKN1B</b>              | NM_004064.4                        | F-primer<br>R-primer | CTGAGGACACGCATTTGGTGGGA<br>GAGTAGAAGAATCGTCGGTTGCAGG    | 114 |
| <b>HES1</b>                | NM_005524.3                        | F-primer<br>R-primer | GGATGCTCTGAAGAAAGATAGCTCGC<br>CGGAGGTGCTTCACTGTCATTTCC  | 81  |
| <b>HEY1</b>                | NM_012258.3                        | F-primer<br>R-primer | CATACGGCAGGAGGGAAAGGTTAC<br>AAGCGGGTCAGAGGCATCTAGT      | 138 |
| <b>HEY2</b>                | XM_017010629.1                     | F-primer<br>R-primer | GCAACAGGGGGTAAAGGCTACT<br>AGATGAGACACAAGCCGCACC         | 158 |
| <b>TREK</b>                | NM_001017424.2                     | F-primer<br>R-primer | GGTGACTACGTTGCAGGTGGAT<br>GCAGCAAAGTAAGCAAGCCCTACAA     | 98  |
| <b>TRPV1</b>               | NM_080706.3                        | F-primer<br>R-primer | TCCAGCAGATGGGCATCTATGC<br>CACCACCGCTGTGGAAAACC          | 113 |
| <b>RB1</b>                 | NM_000321.2                        | F-primer             | CCCTTGCATGGCTCTCAGATTAC                                 | 88  |

|              |             |          |                            |     |
|--------------|-------------|----------|----------------------------|-----|
|              |             | R-primer | GCAGATTCAAGGTGATCAGTTGGTCC |     |
| <b>ACTB</b>  | NM_001101.3 | F-primer | AGAGCTACGAGCTGCCTGACG      | 101 |
|              |             | R-primer | GGACTCCATGCCCAGGAAGGA      |     |
| <b>ATOH1</b> | NM_005172.1 | F-primer | GTGCAGAAGCAGAGACGGCTA      | 175 |
|              |             | R-primer | GCTCGGACAAGGCGTTGATGTAG    |     |
| <b>MASH1</b> | NM_004316.3 | F-primer | CGGACGAGGGCTCTTACGAC       | 129 |
|              |             | R-primer | GTGCGATCACCTGCTTCCA        |     |
| <b>NGN2</b>  | NM_024019.3 | F-primer | CGCTGAGGCACAGTTAGAGCC      | 161 |
|              |             | R-primer | GCTCCTCCTCCTTCTTCGTCCG     |     |

**Supplementary Table 2. Primers used in stem-loop RT-PCR.**

| Primer | Utility        | Sequence                                           |
|--------|----------------|----------------------------------------------------|
| SL-RT  | RT primer      | GTCGTATCCAGTGCAGGGTCCGAGGTATTCGCACTGGATACGACGCCGCA |
| SL-F   | Forward primer | CACGCAGTCCAGGCAGGA                                 |
| SL-R   | Reverse primer | CCAGTGCAGGGTCCGAGGTA                               |

**Table S3. Primer utilized for detection of endoplasmic reticulum stress.**

| Gene              | Accession No.      | Oligos   | Primer sequence            | Amplicon size (bps) |
|-------------------|--------------------|----------|----------------------------|---------------------|
| <b>XBP1-short</b> | NM_001079539<br>.1 | F-primer | CTGAGTCCGAAGCAGGTGCAG      | 109                 |
|                   |                    | R-primer | ATGCCCAACAGGATATCAGACTCTGA |                     |
| <b>XBP1-long</b>  | NM_005080.3        | F-primer | GCAGCACTCAGACTACGTGCA      | 127                 |
|                   |                    | R-primer | ATGCCCAACAGGATATCAGACTCTGA |                     |

**Supplementary Table 4. Primer used in TRAP assay.**

| Oligo        | Primer sequence          |
|--------------|--------------------------|
| TS (forward) | AATCCGTCGAGCAGAGTT       |
| CX (reverse) | CCCTTACCCTTACCCTTACCCTAA |

**Supplementary movies**

**Movie S1. Live-imaging microscopy of  $mi^{high}\Delta pl$  neural progenitors.** Note the stationary nature of these G0 synchronised cells.

**Movie S2. Type or paste caption here. Live-imaging microscopy of control neural progenitors.**

**Movie S3. Type or paste caption here. Live-imaging microscopy of  $mi^{high}\Delta mi$  neural progenitors.**

**Movie S4. Type or paste caption here. Live-imaging microscopy of  $mi^{low}\Delta As$  neural progenitors.**
